# Supplementary material for: Venetoclax with hypomethylating agents versus intensive chemotherapy in newly diagnosed acute myeloid leukemia with myelodysplasia related changes: A propensity score-matched analysis based on International Consensus Classification
Source: PubMed Central journal article supplement — Blood Cancer J. 2024 Aug 23;14(1):144. doi: 10.1038/s41408-024-01130-7 (PMC11344036; doi:10.1038/s41408-024-01130-7), 2024-08-23
Supplement: 41408_2024_1130_MOESM1_ESM.pdf [file 41408_2024_1130_MOESM1_ESM.pdf]

## Supplementary Figure

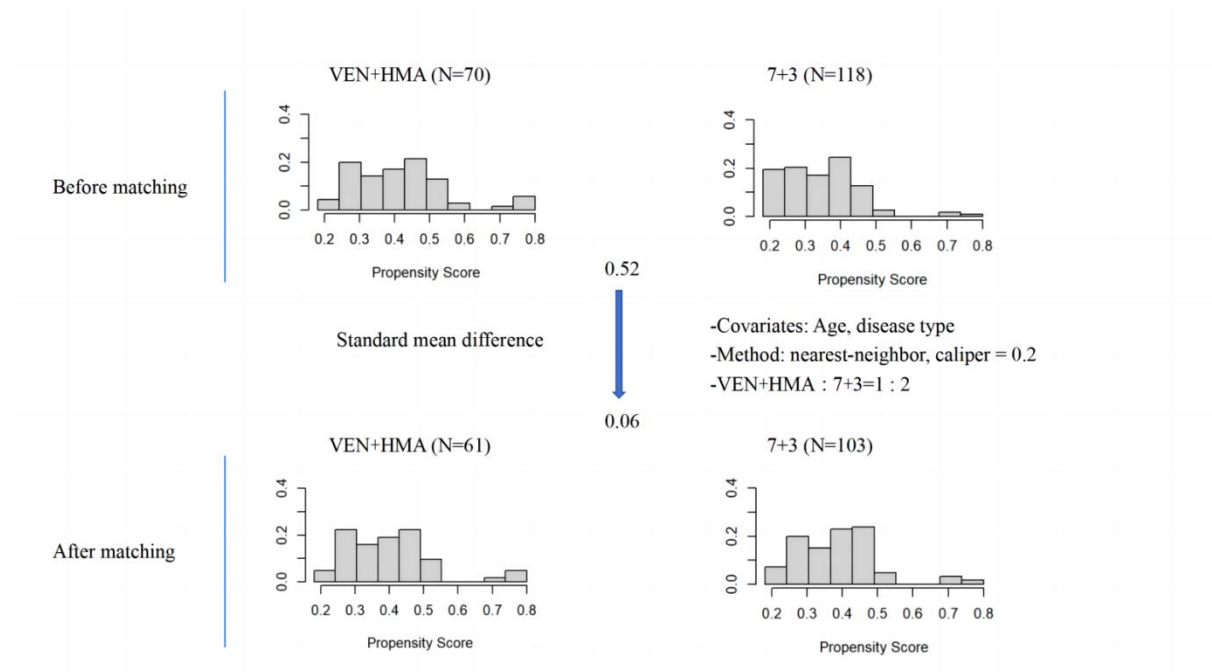

**Supplementary figure 1. Propensity score matching process.** VEN+HMA, venetoclax plus hypomethylating agents; Disease type: de novo AML or secondary/therapy-related AML.

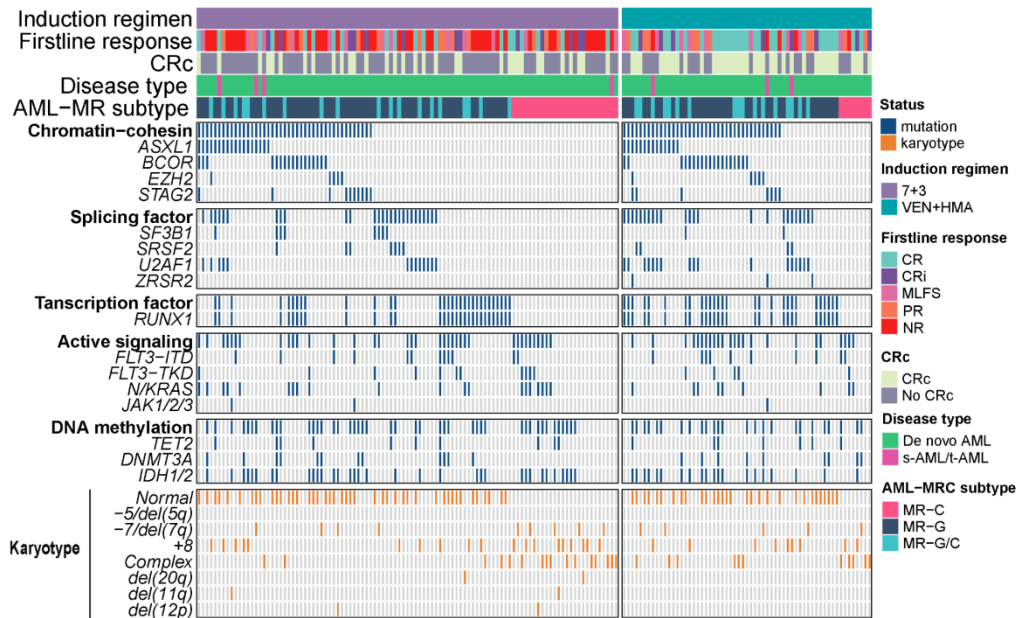

**Supplementary figure 2. Clinical response and cytogenetic landscape of 103 AML-MR patients in 7+3 cohort and 61 AML-MR patients in VEN+HMA cohort.** Abbreviations: CR, complete remission; CRi, CR with incomplete count recovery; CRc, composite complete remission; MLFS, morphologic leukemia-free state; PR, partial remission; NR, no remission; MR-C, myelodysplasia-related cytogenetic abnormalities; MR-G, myelodysplasia-related gene mutations; MR-G/C, both myelodysplasia-related gene mutations and cytogenetic abnormalities; s-AML, secondary AML; t-AML, therapy-related AML; VEN+HMA, venetoclax plus hypomethylating agents.

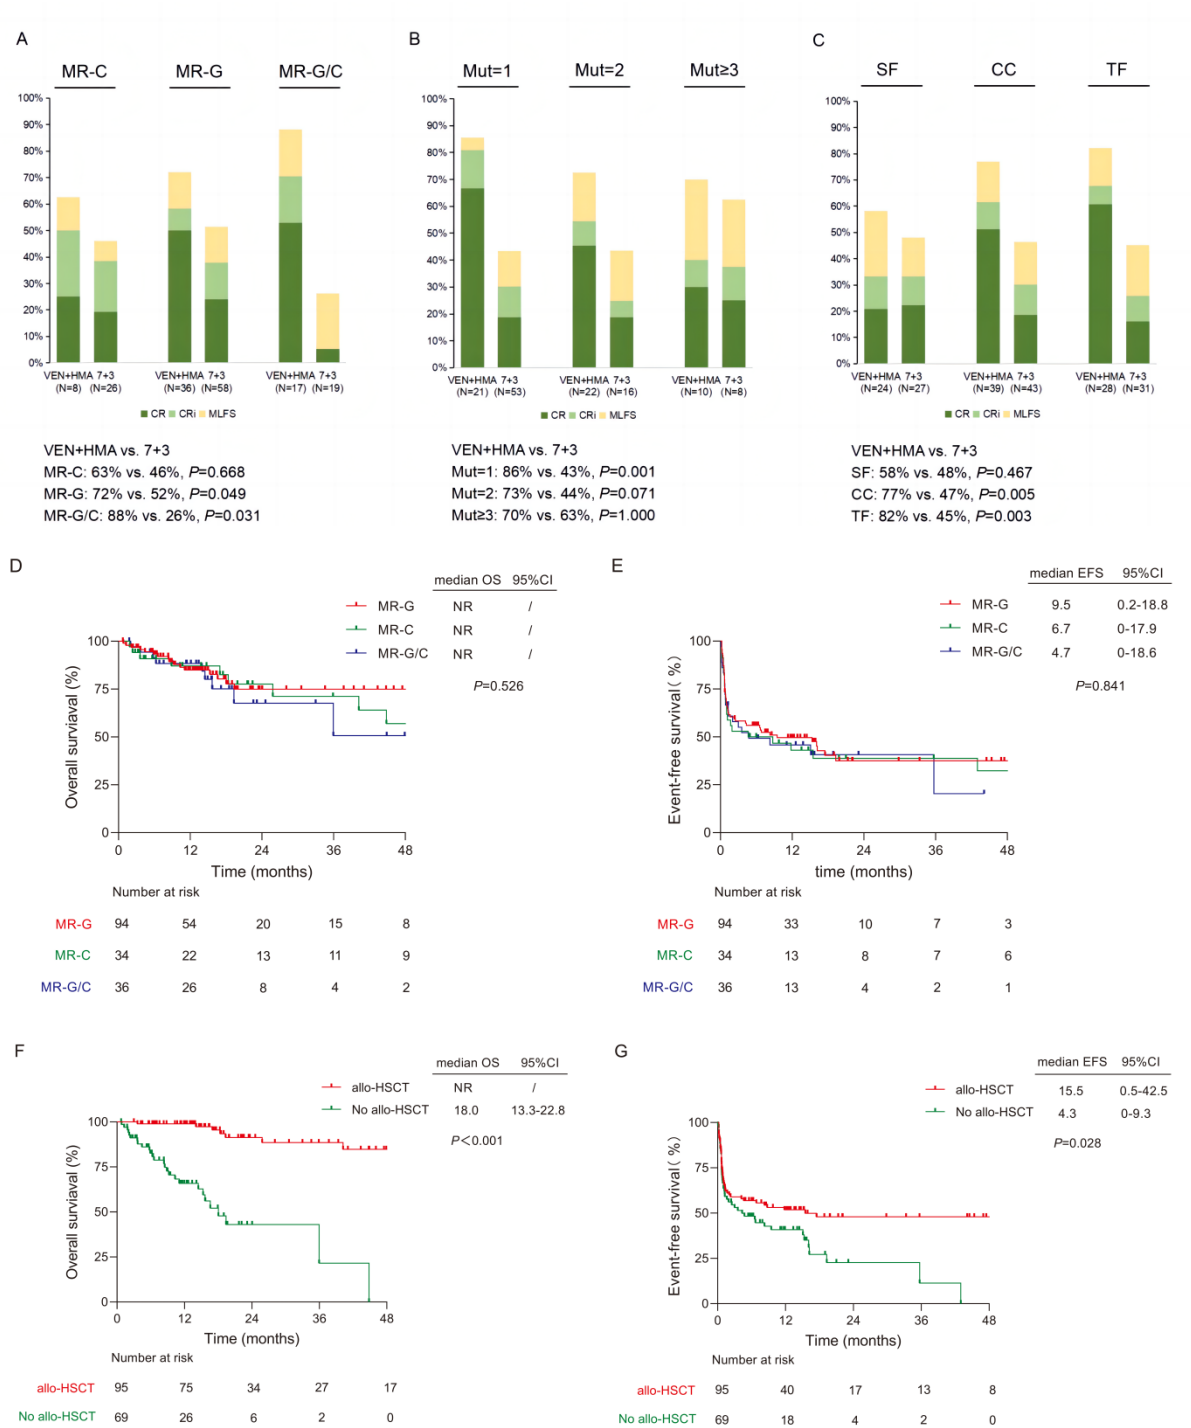

**Supplementary figure 3. Responses and survival analysis.** (A-C) Comparison of treatment overall response rate in subgroups. (D-E) OS and EFS comparison between patients with different myelodysplasia-related abnormalities. (F-G) OS and EFS comparison between AML-MR patients with or without allo-HSCT. Abbreviations: MR-C, myelodysplasia-related cytogenetic abnormalities; MR-G, myelodysplasia-related gene mutations; MR-G/C, both myelodysplasia-related gene mutations and cytogenetic abnormalities; mut=1, one myelodysplasia-related gene mutation; mut=2, two myelodysplasia-related genes mutation; mut≥3, three or more myelodysplasia-related genes mutation; SF, splicing factor; CC, chromatin-cohesin; TF, transcription factor; UVA, Univariable analysis; MVA, multivariable analysis; CI, confidence interval; allo-HSCT, allogeneic hematopoietic stem cell transplantation; NR, not reached; OS, overall survival; EFS, event-free survival; VEN+HMA, venetoclax plus hypomethylating agents.

## Supplementary Table

**Supplementary table 1. Breakdown of MDS related cytogenetic abnormalities in VEN+HMA and 7+3 cohorts.**

| Cytogenetic abnormalities | VEN+HMA  | 7+3      |
|---------------------------|----------|----------|
|                           | n=61     | n=103    |
| Complex karyotype         | 11 (18%) | 16 (16%) |
| del(5q)/t(5q)/add(5q)     | 0        | 0        |
| -7/del(7q)                | 5 (8%)   | 9 (9%)   |
| +8                        | 9 (15%)  | 19 (18%) |
| del(12p)/t(12p)/add(12p)  | 0        | 2 (2%)   |
| i(17q)                    | 0        | 0        |
| -17/add(17p)/del(17p)     | 0        | 0        |
| idic(X)(q13)              | 0        | 0        |

**Abbreviations:** VEN+HMA, venetoclax plus hypomethylating agents.

**Supplementary table 2. Distribution of different regimens in VEN+HMA and 7+3 cohorts.**

| <b>VEN+HMA</b>            |       |
|---------------------------|-------|
|                           | n=61  |
| VEN+Azacitidine           | 32    |
| VEN+Decitabine            | 28    |
| VEN+Azacitidine+Sorafenib | 1     |
| <b>7+3</b>                |       |
|                           | n=103 |
| IA                        | 80    |
| IAC                       | 14    |
| IA+Sorafenib              | 1     |
| DA                        | 2     |
| MA                        | 3     |
| HA                        | 3     |

**Abbreviations:** VEN, Venetoclax; IA, Idarubicin and Cytarabine; IAC, Idarubicin, Cytarabine and Cladribine; DA, Daunorubicin and Cytarabine; MA, Mitoxantrone and Cytarabine; HA, Homoharringtonine and Cytarabine.

**Supplementary table 3. Comparison of treatment responses to different induction regimens in the matched cohorts.**

|                                                       | VEN+HMA<br>(n=61) | 7+3<br>(n=103) | <i>P</i> -value |
|-------------------------------------------------------|-------------------|----------------|-----------------|
| <b>Response outcome after 1 cycle of induction</b>    |                   |                |                 |
| ORR                                                   | 46 (75%)          | 47 (46%)       | <0.001          |
| CR                                                    | 29 (48%)          | 20 (19%)       |                 |
| CRi                                                   | 8 (13%)           | 13 (13%)       |                 |
| MLFS                                                  | 9 (15%)           | 14 (14%)       |                 |
| PR                                                    | 10 (16%)          | 14 (14%)       |                 |
| NR                                                    | 5 (8%)            | 42 (41%)       |                 |
| CRc rate                                              | 37 (61%)          | 33 (32%)       | <0.001          |
| MFC MRD available                                     | 35                | 32             |                 |
| CR with negative MFC MRD                              | 28 (46%)          | 20 (19%)       | <0.001          |
| CR with positive MFC MRD                              | 7 (11%)           | 12 (12%)       |                 |
| Splicing factor mutation                              | 24                | 27             |                 |
| CRc rate                                              | 8 (33%)           | 9 (33%)        | 1.000           |
| Chromatin-cohesin mutation                            | 39                | 43             |                 |
| CRc rate                                              | 24 (62%)          | 13 (30%)       | 0.004           |
| Transcription factor mutation                         | 28                | 31             |                 |
| CRc rate                                              | 19 (68%)          | 8 (26%)        | 0.001           |
| <b>Response outcome after 1~2 cycles of induction</b> |                   |                |                 |
| ORR                                                   | 52 (85%)          | 72 (70%)       | 0.027           |
| CR                                                    | 35 (57%)          | 37 (36%)       |                 |
| CRi                                                   | 7 (11%)           | 17 (17%)       |                 |
| MLFS                                                  | 10 (16%)          | 18 (17%)       |                 |
| PR                                                    | 2 (3%)            | 9 (9%)         |                 |
| NR                                                    | 7(11%)            | 22 (21%)       |                 |
| CRc rate                                              | 42 (69%)          | 54 (52%)       | 0.039           |
| MFC MRD available                                     | 39                | 48             |                 |
| CR with MFC MRD negative                              | 34 (56%)          | 37 (36%)       | 0.013           |
| CR with MFC MRD positive                              | 5 (8%)            | 11 (11%)       |                 |

**Abbreviations:** ORR, Overall response rate; CR, complete remission; CRi, CR with incomplete blood count recovery; MLFS, morphologic leukemia-free state; CRc, Composite complete remission; PR, partial remission; NR, no response; VEN+HMA, venetoclax plus hypomethylating agents; MFC, multi-parameter flow cytometry; MRD, measurable residual disease.

**Supplementary table 4. Treatment response of matched patients categorized according to gene mutation.**

| Mutations            | VEN+HMA<br>(n=61) |                 |                 | 7+3<br>(n=103) |                 |                 | P-value <sup>1</sup> | P-value <sup>2</sup> |
|----------------------|-------------------|-----------------|-----------------|----------------|-----------------|-----------------|----------------------|----------------------|
|                      | All patients      | Patients in CRc | Patients in ORR | All patients   | Patients in CRc | Patients in ORR |                      |                      |
| Splicing factor      | 24 (39%)          | 8 (33%)         | 14 (58%)        | 27 (26%)       | 9 (33%)         | 13 (48%)        | 1.000                | 0.467                |
| <i>U2AF1</i>         | 17 (28%)          | 3 (18%)         | 9 (53%)         | 13 (13%)       | 4 (31%)         | 5 (38%)         | 0.666                | 0.484                |
| <i>SF3B1</i>         | 2 (3%)            | 2 (100%)        | 2 (100%)        | 8 (8%)         | 2 (25%)         | 3 (38%)         | 0.133                | 0.444                |
| <i>SRSF2</i>         | 4 (7%)            | 3 (75%)         | 4 (100%)        | 7 (7%)         | 3 (43%)         | 5 (71%)         | 0.545                | 0.491                |
| <i>ZRSR2</i>         | 3 (5%)            | 1 (33%)         | 1 (33%)         | 0              | -               | -               | -                    | -                    |
| Chromatin-cohesin    | 39 (64%)          | 24 (62%)        | 30 (77%)        | 43 (42%)       | 13 (30%)        | 20 (47%)        | 0.004                | 0.005                |
| <i>ASXL1</i>         | 14 (23%)          | 8 (57%)         | 10 (71%)        | 18 (17%)       | 4 (22%)         | 8 (44%)         | 0.068                | 0.165                |
| <i>BCOR</i>          | 19 (31%)          | 11 (58%)        | 15 (79%)        | 17 (17%)       | 5 (29%)         | 7 (41%)         | 0.106                | 0.039                |
| <i>EZH2</i>          | 5 (8%)            | 4 (80%)         | 5 (100%)        | 5 (5%)         | 2 (40%)         | 3 (60%)         | 0.524                | 0.444                |
| <i>STAG2</i>         | 7 (11%)           | 4 (57%)         | 5 (71%)         | 10 (10%)       | 5 (50%)         | 7 (70%)         | 1.000                | 1.000                |
| Transcription factor | 28 (46%)          | 19 (68%)        | 23 (82%)        | 31 (30%)       | 8 (26%)         | 14 (45%)        | 0.001                | 0.003                |
| <i>RUNX1</i>         | 28 (46%)          | 19 (68%)        | 23 (82%)        | 31 (30%)       | 8 (26%)         | 14 (45%)        | 0.001                | 0.003                |

**Abbreviations:** CRc, Composite complete remission; ORR, Overall response rate; VEN+HMA, venetoclax plus hypomethylating agents.

P-value<sup>1</sup>: CRc rate comparison between VEN+HAM and 7+3 cohorts.

P-value<sup>2</sup>: ORR comparison between VEN+HAM and 7+3 cohorts.
